# Supplementary material for: The Evolution of Sex Chromosomes and Dosage Compensation in Plants
Source: PubMed Central journal article supplement — Genome Biol Evol. 2017 Mar 1;9(3):627–45. doi: 10.1093/gbe/evw282 (PMC5629387; doi:10.1093/gbe/evw282), 2017-03-01
Supplement: evw282_Supp.pdf [file evw282_Supp.pdf]

# The evolution of sex chromosomes and dosage compensation in plants

Aline Muyle<sup>1\*</sup>, Rylan Shearn<sup>1</sup>, Gabriel Marais<sup>1</sup>

<sup>1</sup> *Laboratoire de Biométrie et Biologie Evolutive (UMR 5558), CNRS/Université Lyon 1, Villeurbanne, France.*

\* Corresponding author: Aline Muyle, *Laboratoire de Biométrie et Biologie Evolutive (UMR 5558), CNRS/Université Lyon 1, Villeurbanne, France.* Telephone: +33.4.72.44.81.70, fax: +33.4.72.43.13.88, [aline.muyle@univ-lyon1.fr](mailto:aline.muyle@univ-lyon1.fr)

## Supplementary Material

Age of first reproduction was used as a proxy for generation time following the example of Gaillard et al. (2005). Using data on 56 primates (Wootton 1987), extant apes have an average age of first reproduction of 9.7 years, Old World monkeys 4.7 years and New World monkeys 2.8 years. This suggests a generation time of approximately 4 years (or 0.25 generations per year) for the Catarrhini ancestor, assuming that the longer generation time in apes is a derived state (Jones 2011).

## References

- Gaillard J-M et al. 2005. Generation time: a reliable metric to measure life-history variation among mammalian populations. *Am. Nat.* 166:119-123-128. doi: 10.1086/430330.
- Jones JH. 2011. Primates and the evolution of long, slow life histories. *Curr. Biol. CB.* 21:R708-717. doi: 10.1016/j.cub.2011.08.025.
- Wootton JT. 1987. The Effects of Body Mass, Phylogeny, Habitat, and Trophic Level on Mammalian Age at First Reproduction. *Evolution.* 41:732-749. doi: 10.2307/2408884.
